# Supplementary figures and images for: Phylogenetic Analyses of Rotavirus A from Cattle in Uruguay Reveal the Circulation of Common and Uncommon Genotypes and Suggest Interspecies Transmission
Source: MDPI journal article supplement (doi:10.3390/pathogens9070570), 2020-07-14

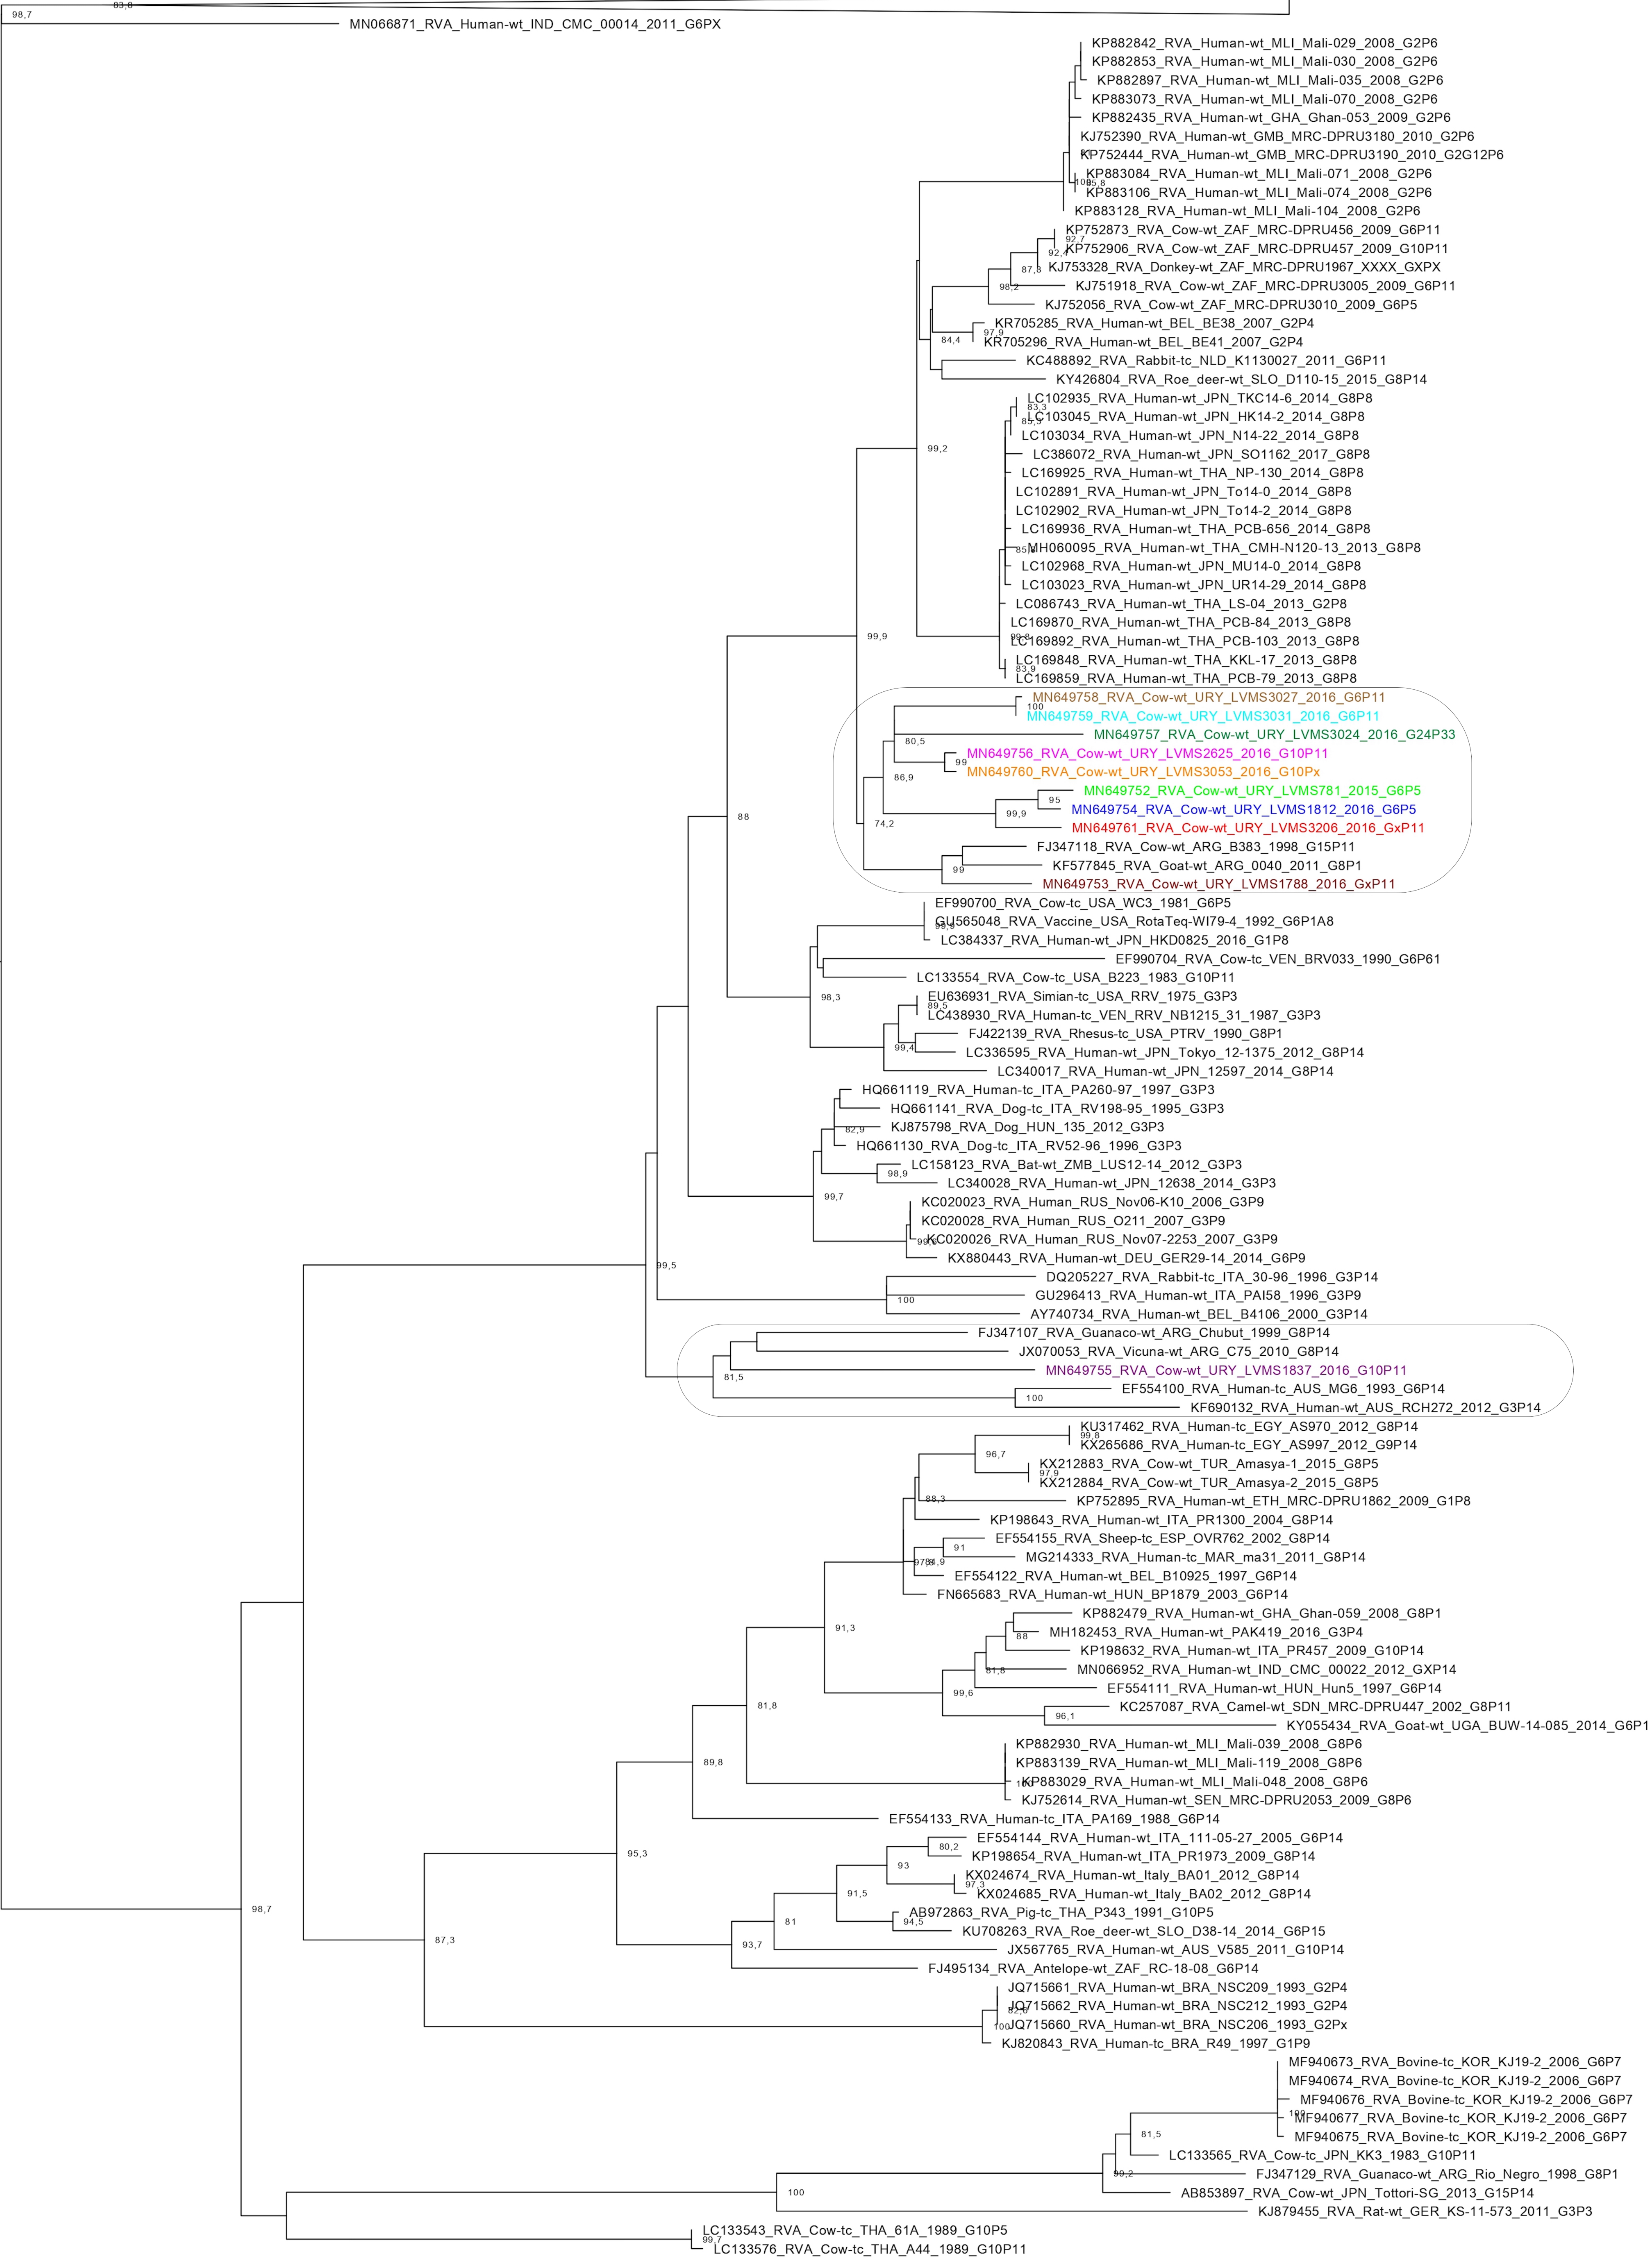

Supplement: s1 [file s1]

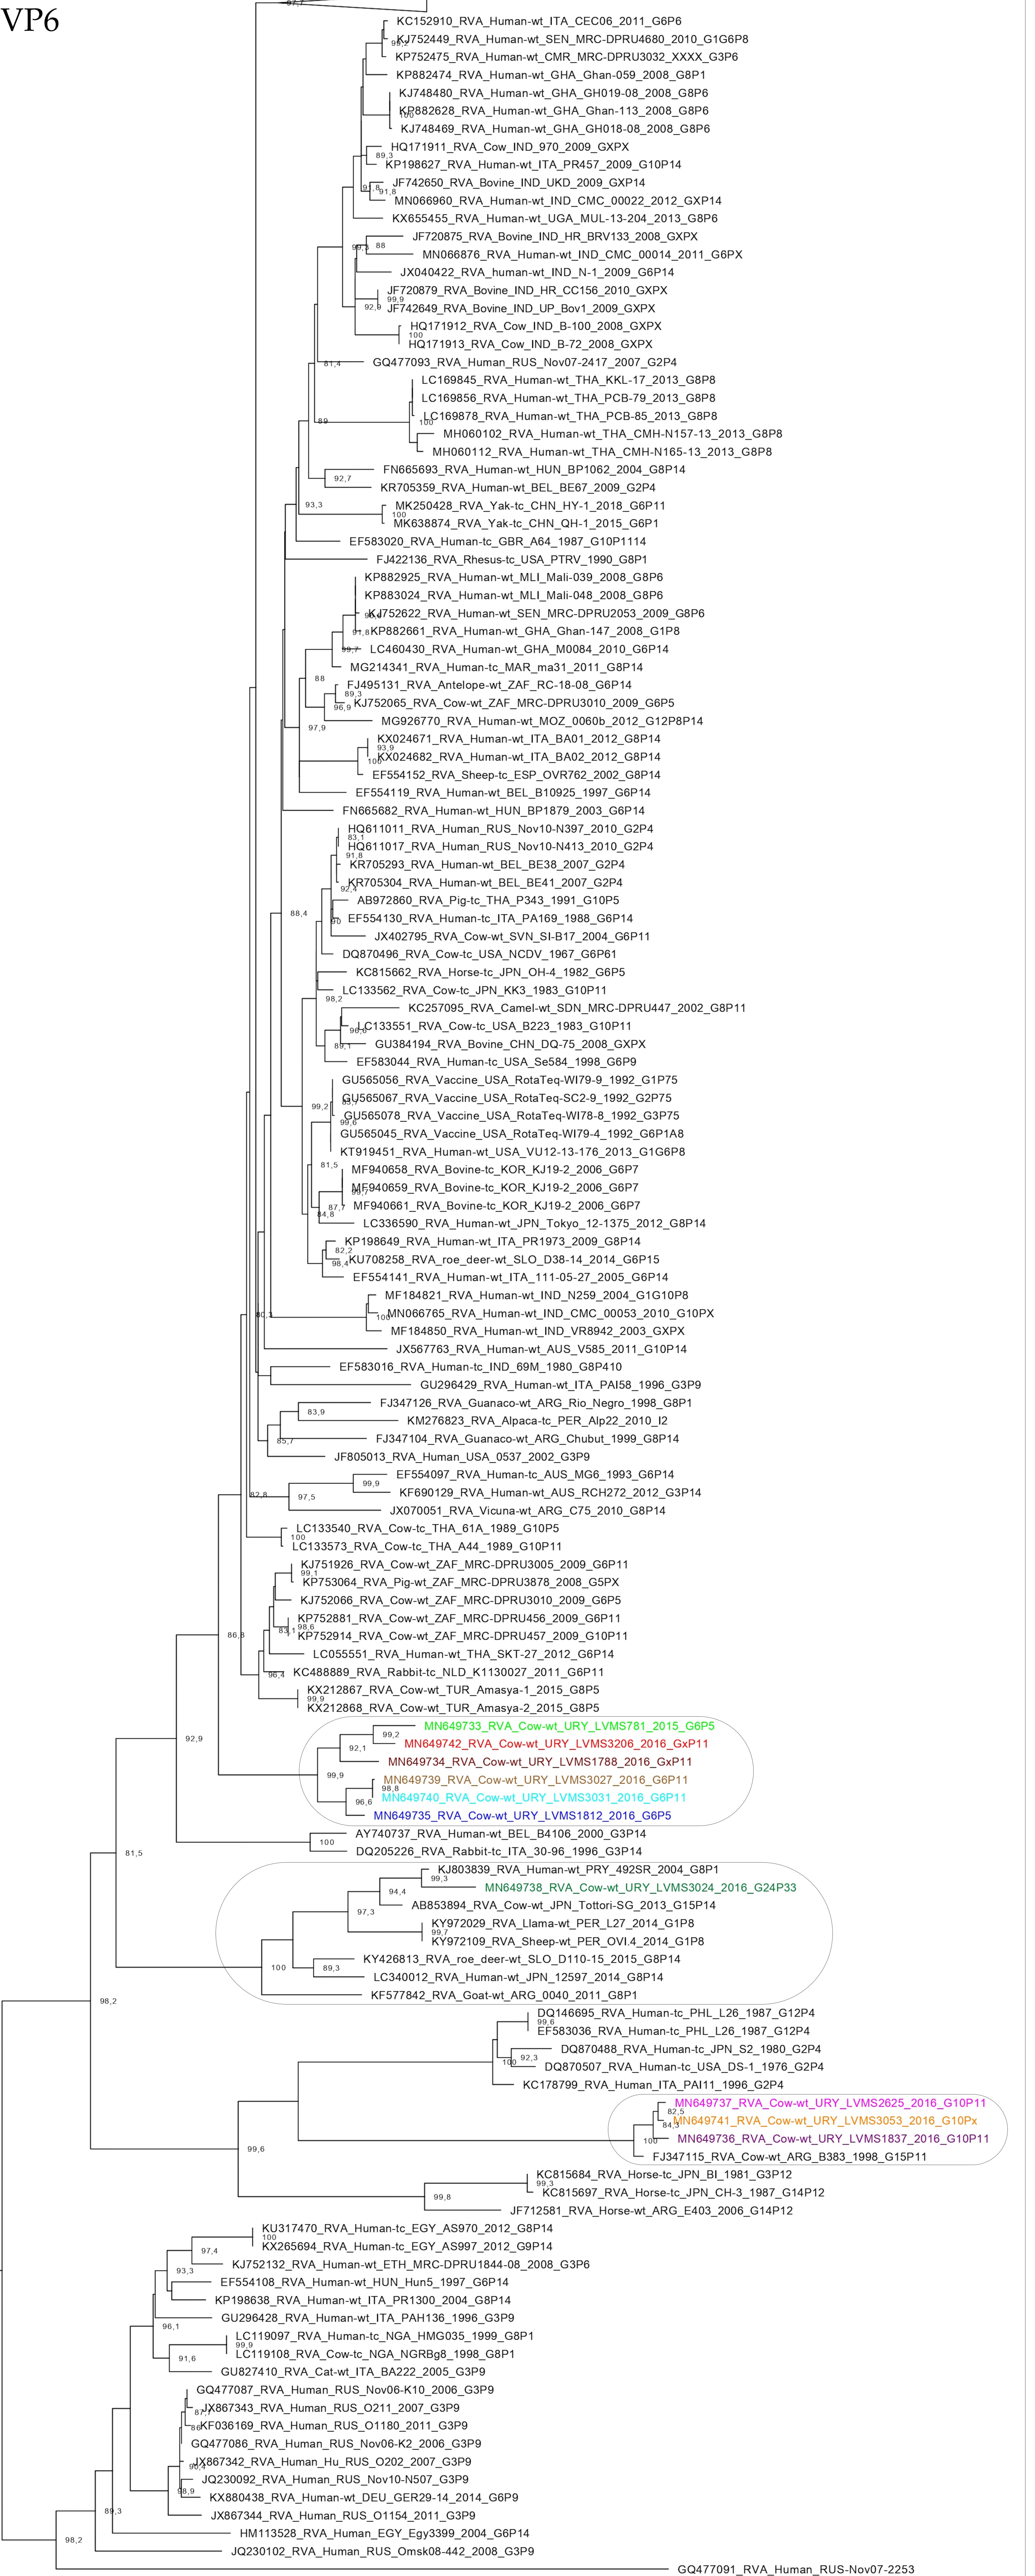

Supplement: s1 [file s1]

NSP4

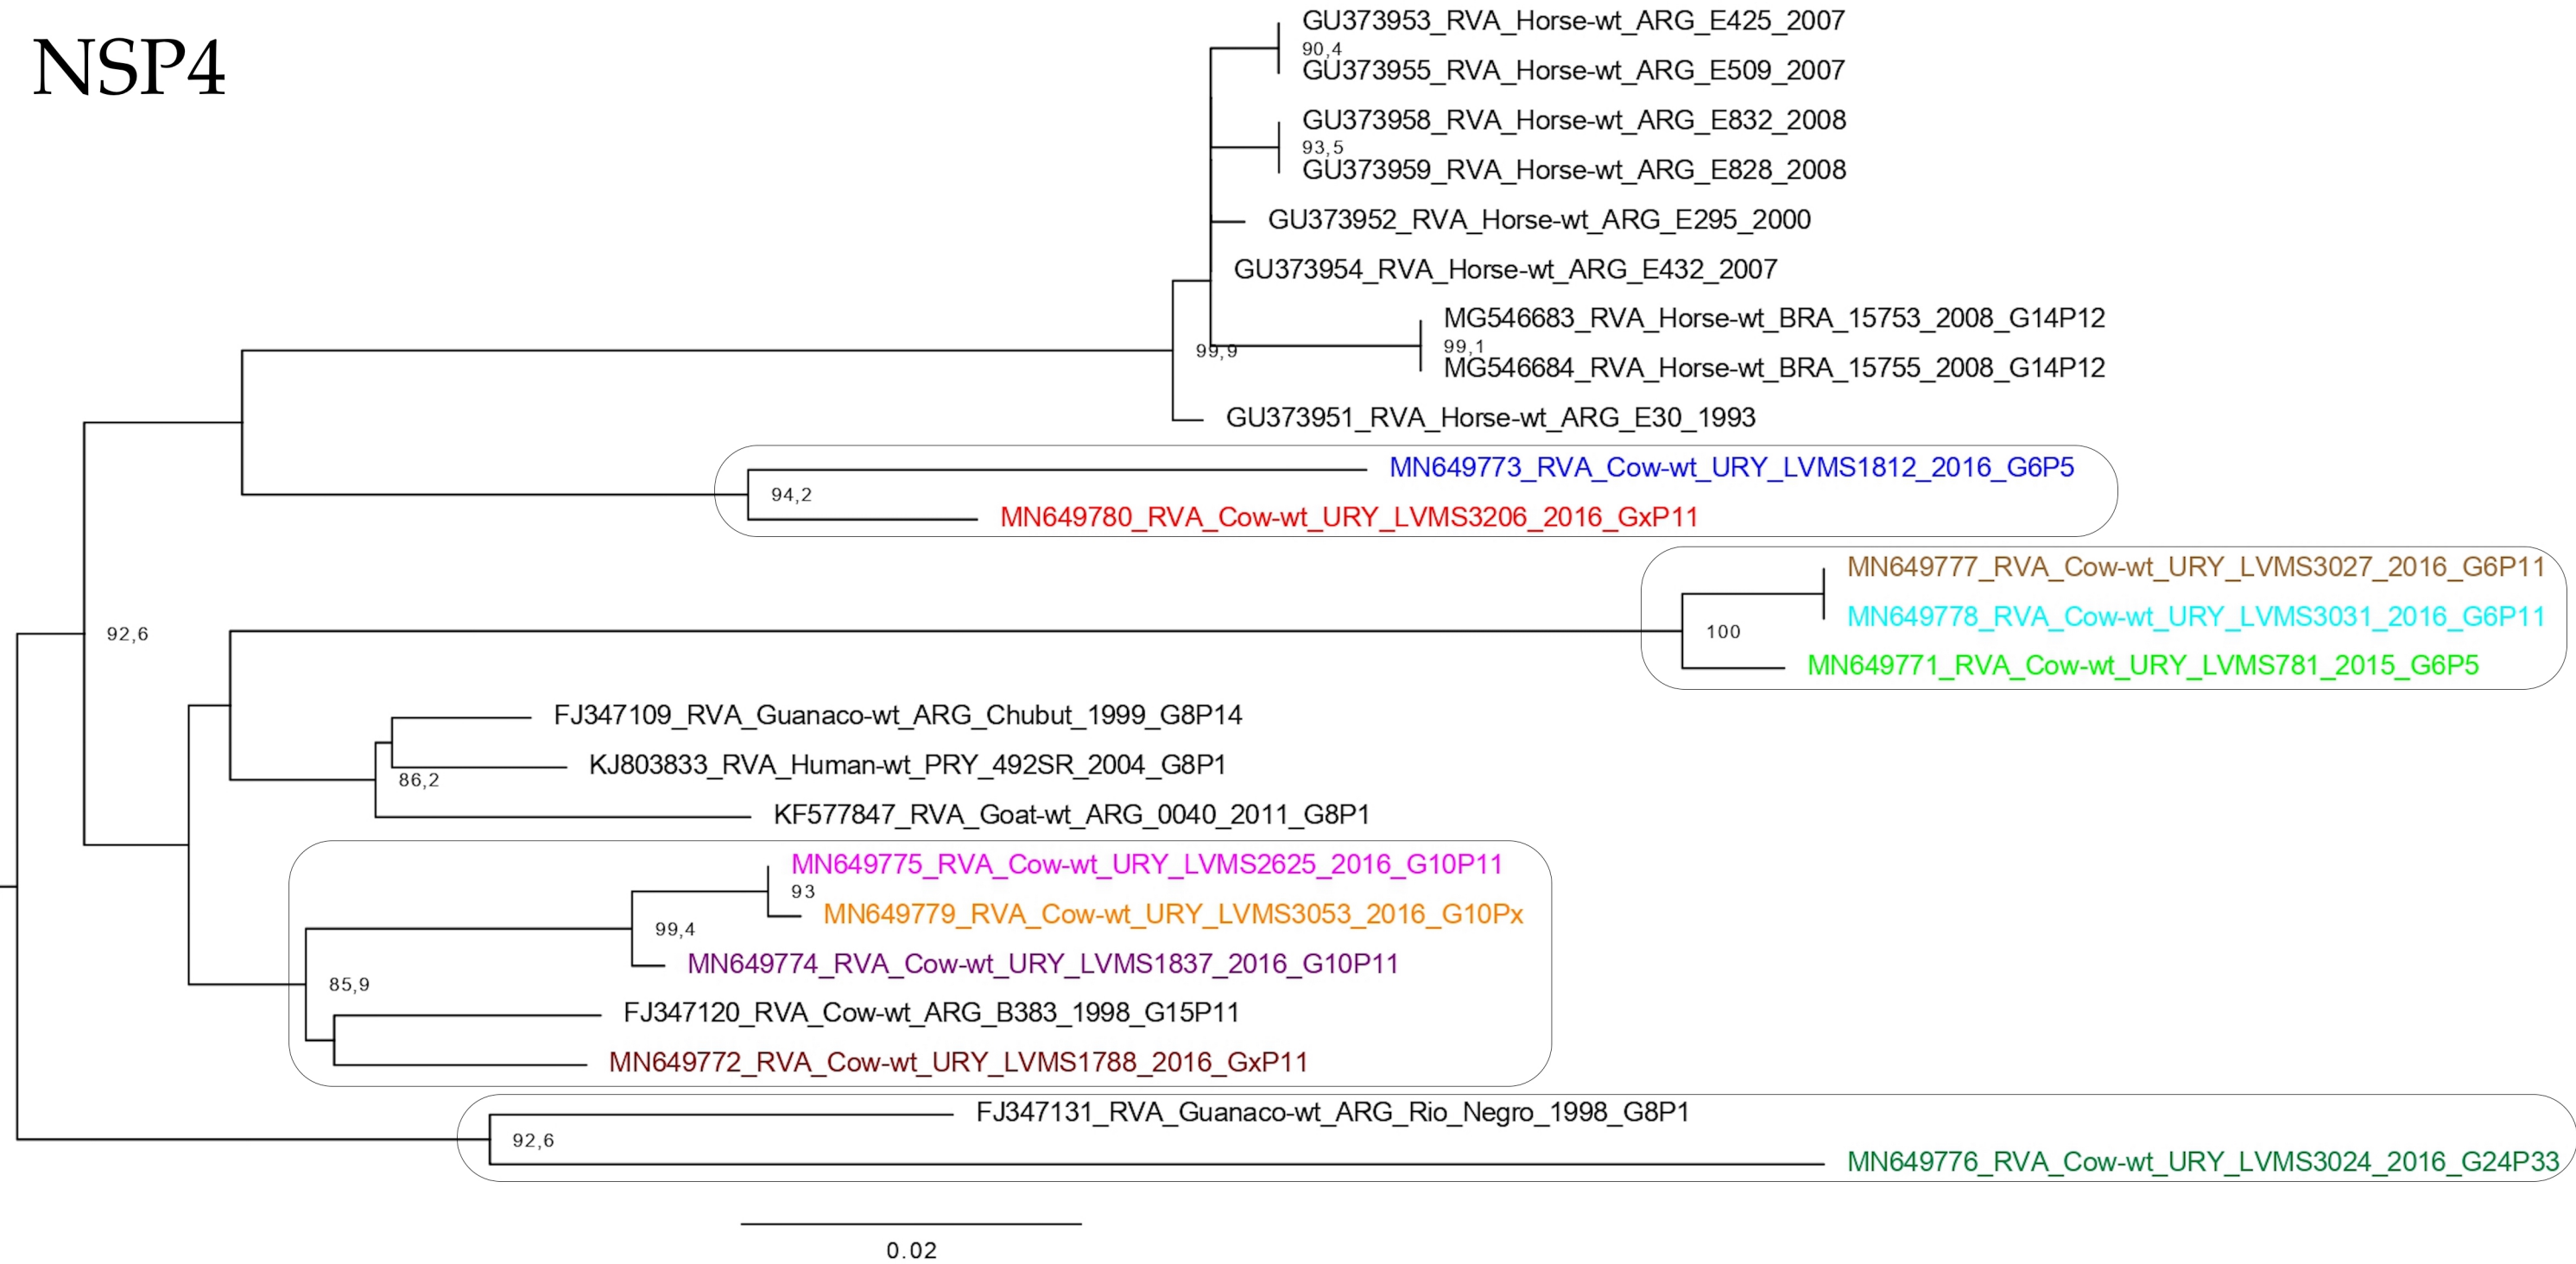

E12

Supplement: s1 [file s1]

NSP3

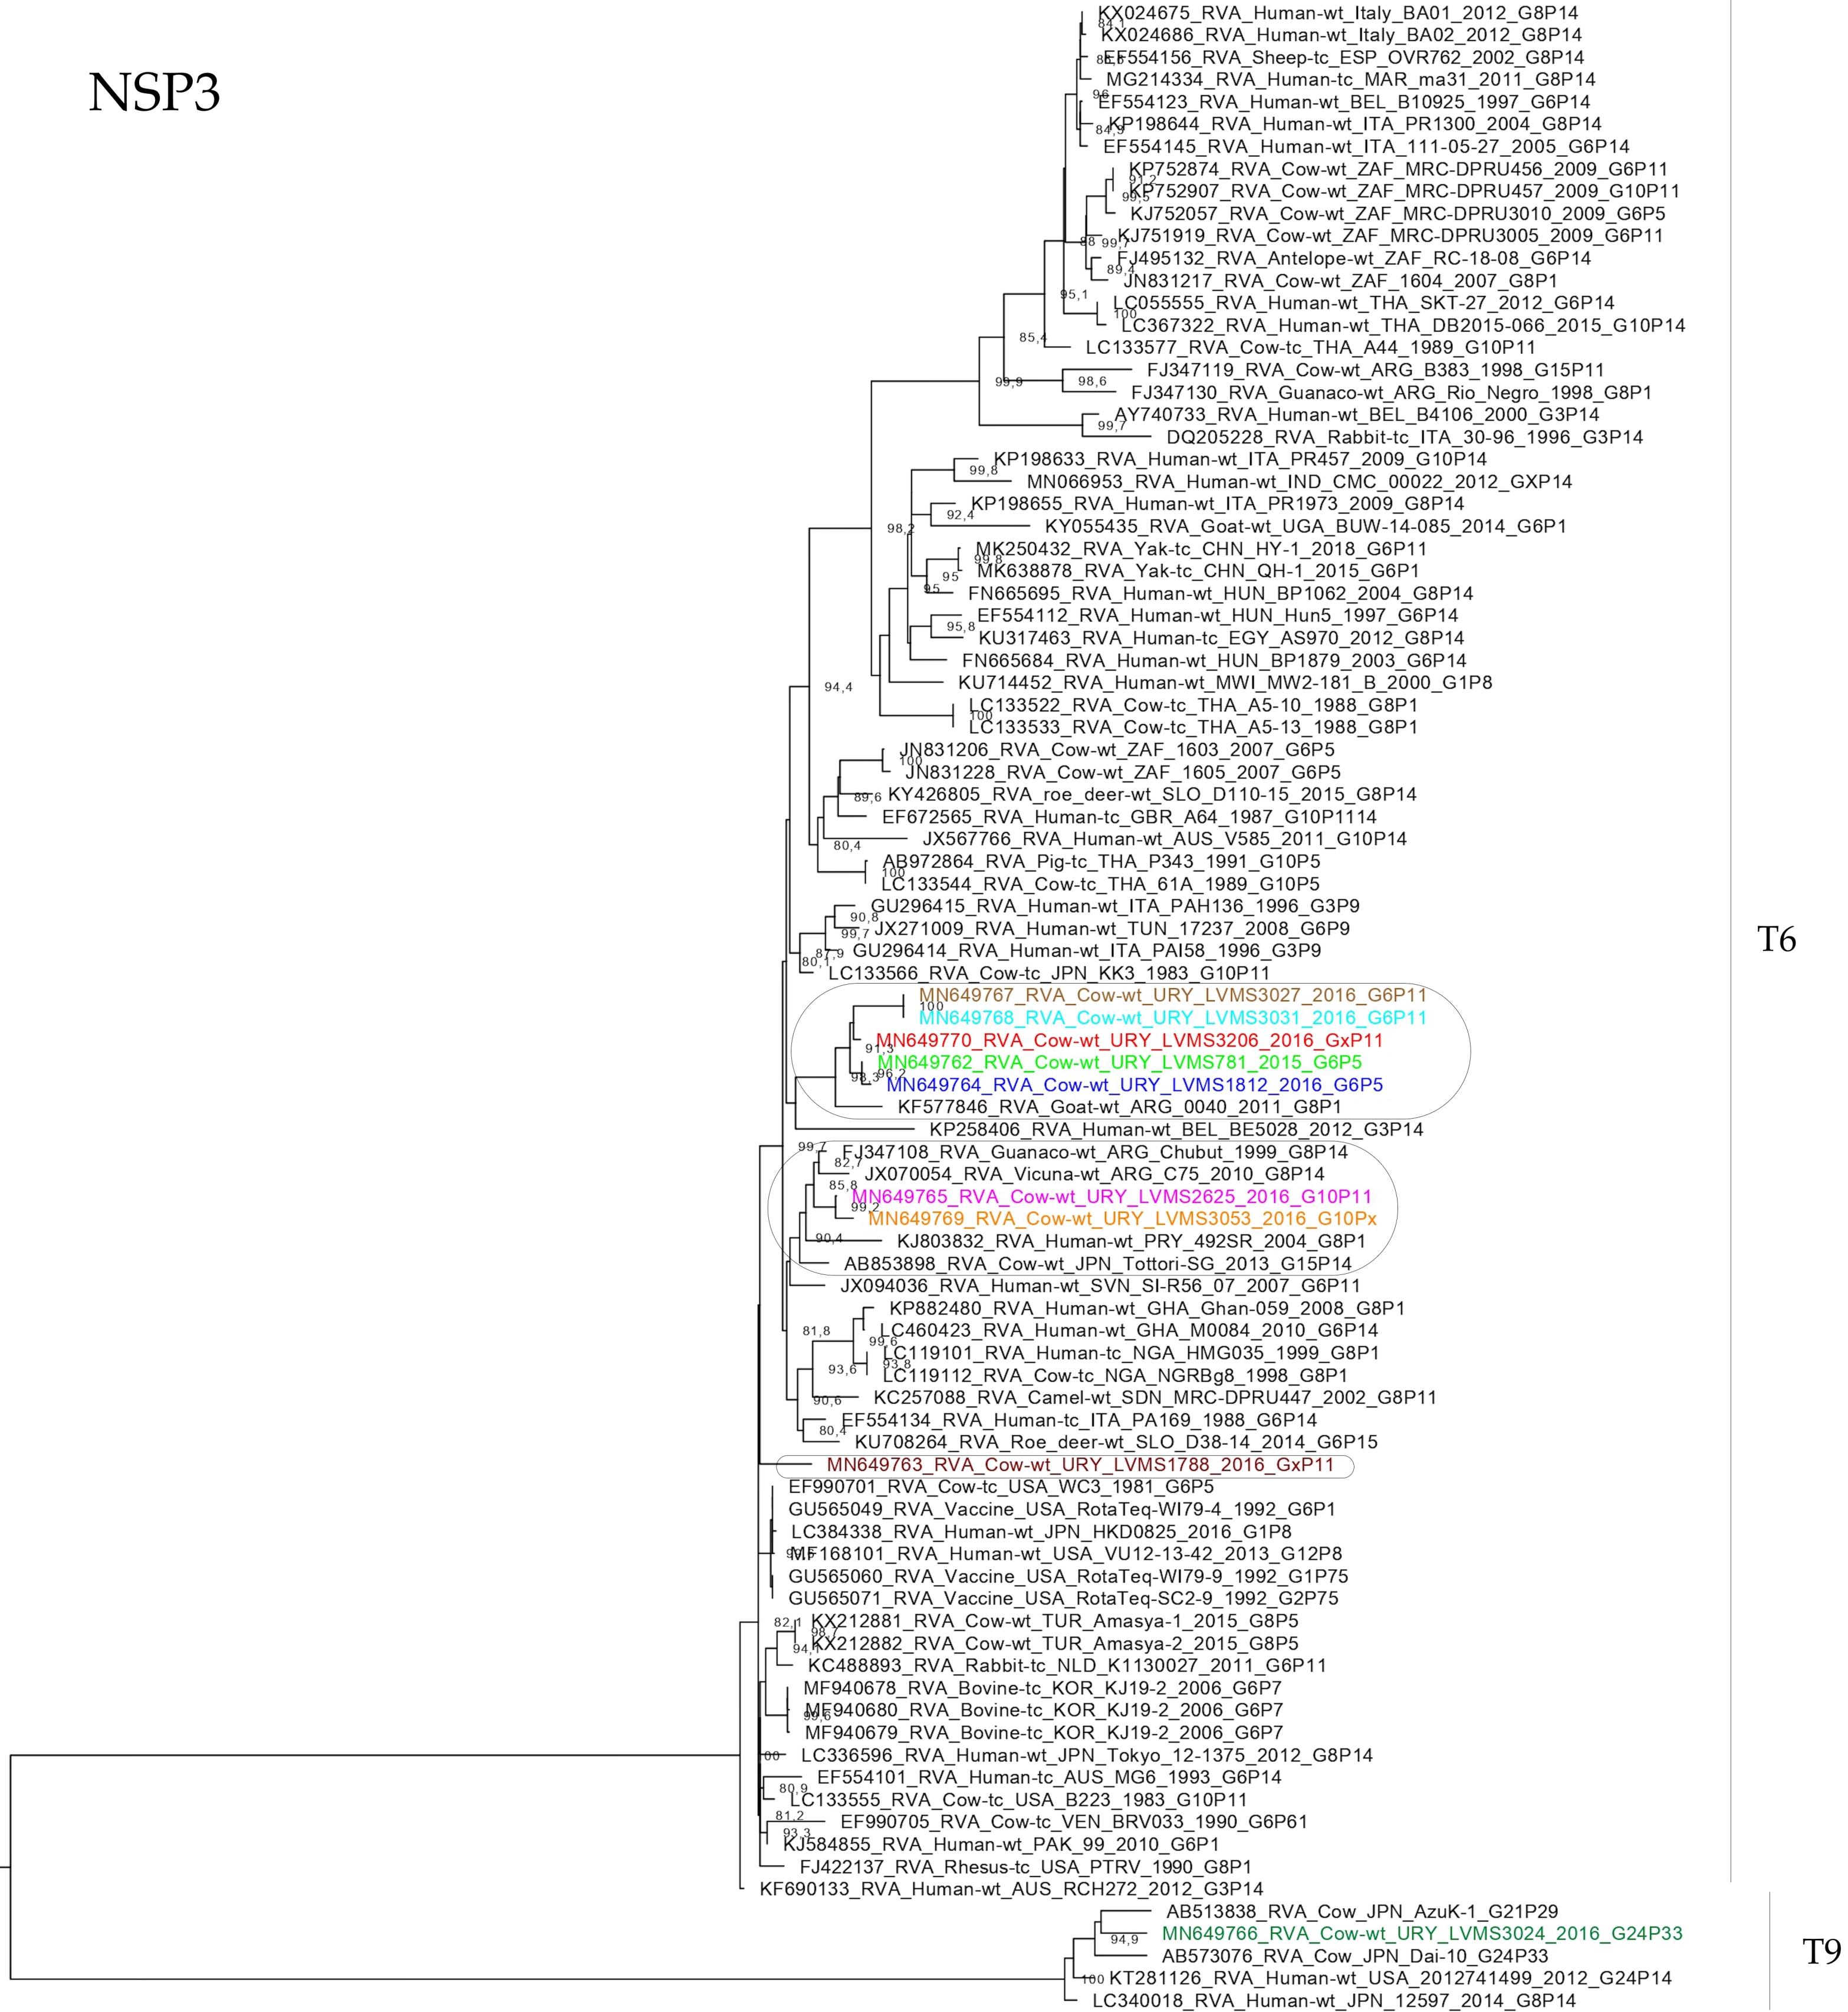

T6

T9

Supplement: s1 [file s1]

NSP5

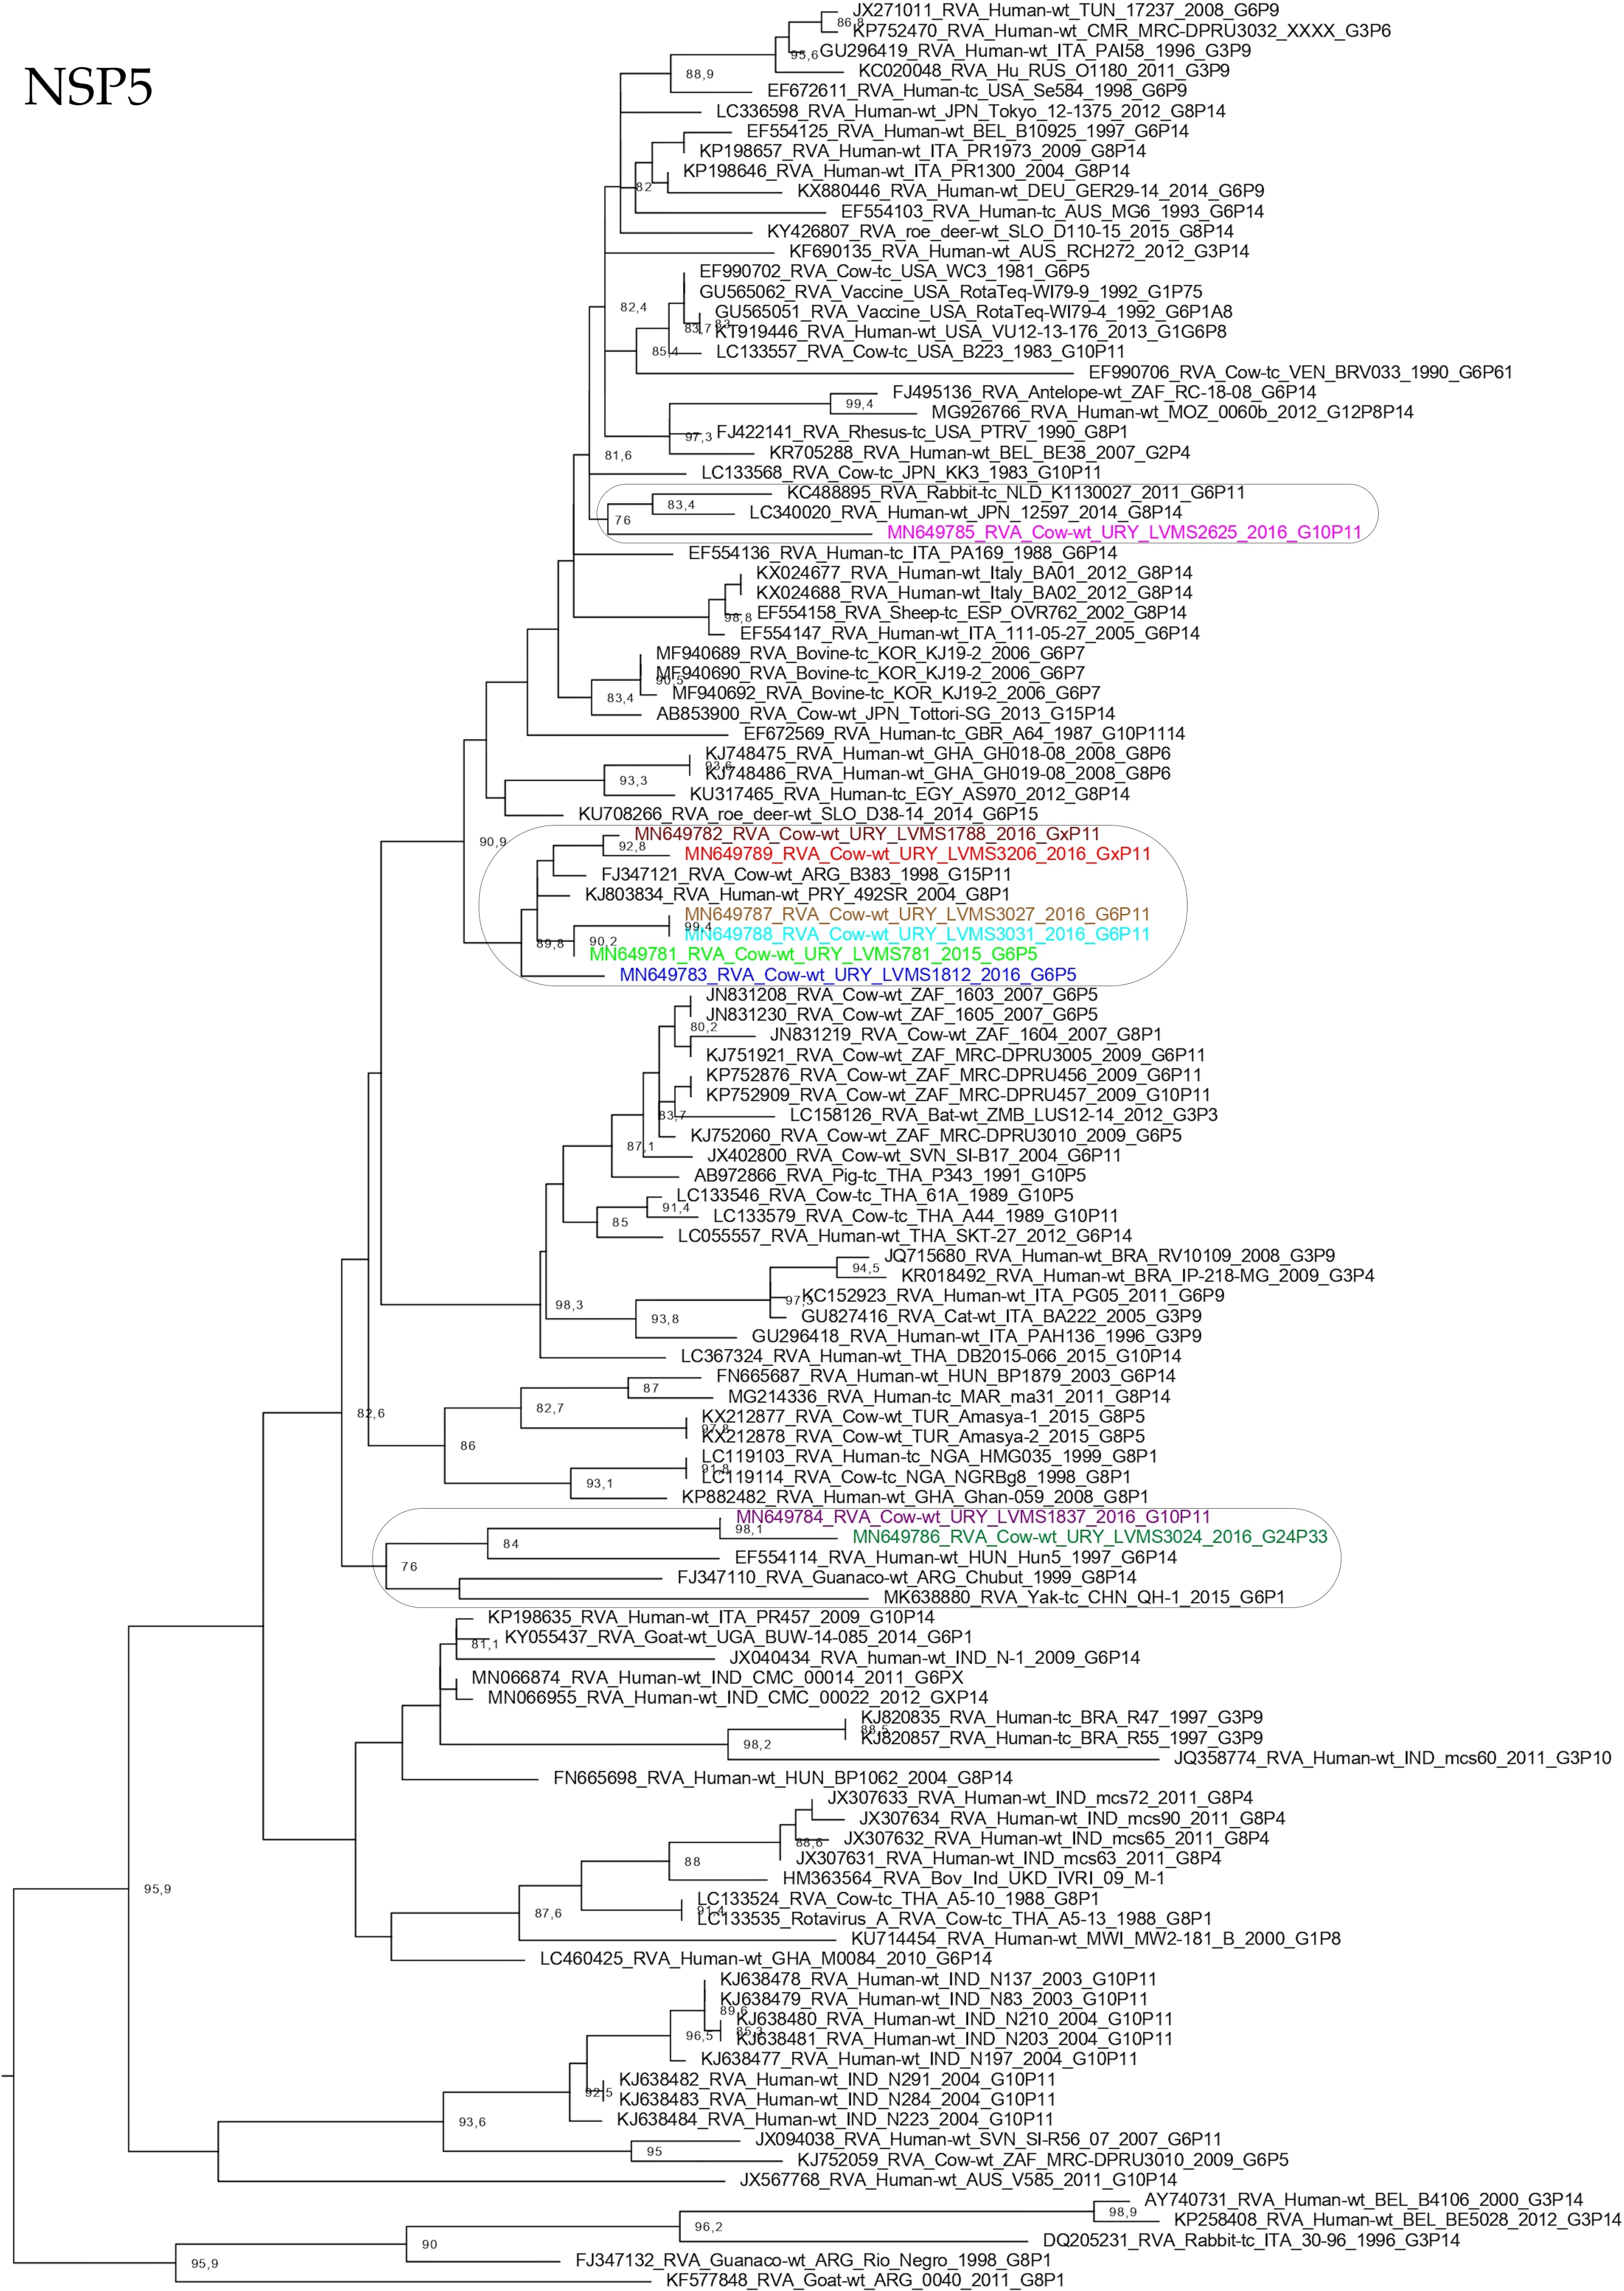

H3

Supplement: s1 [file s1]

NSP1

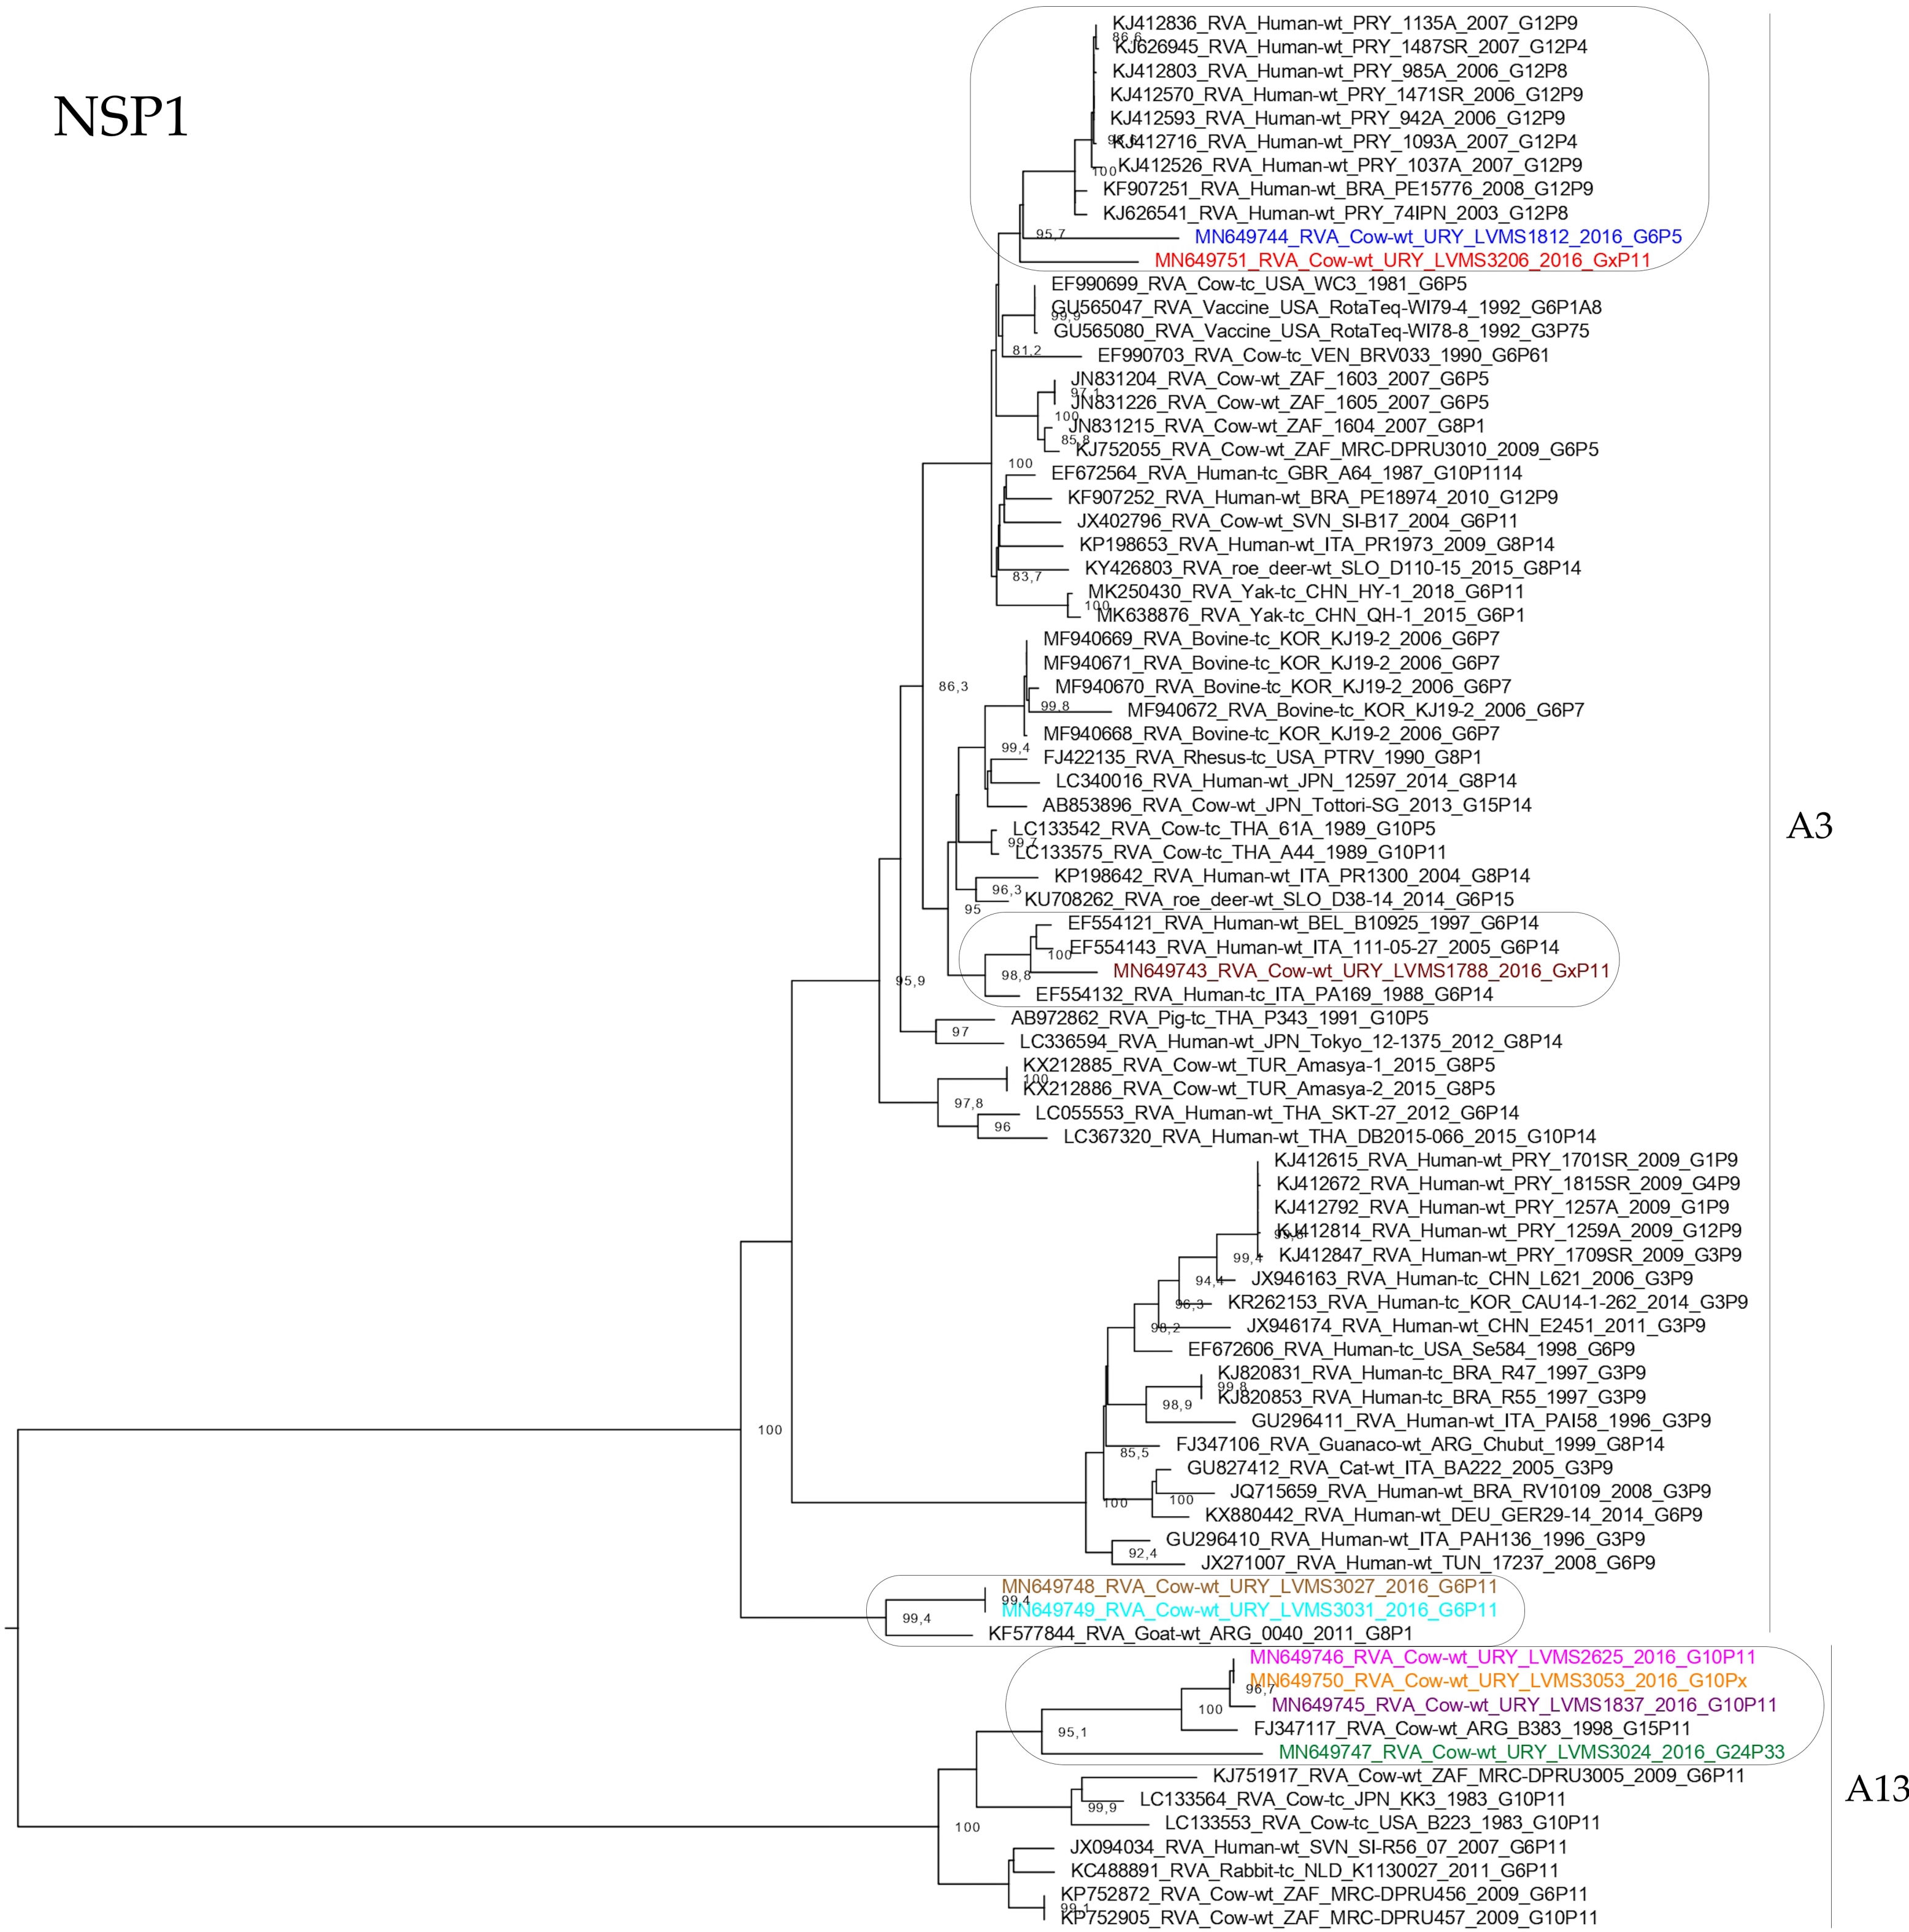

A3

A13

Supplement: s1 [file s1]
